# Supplementary material for: Plasma membrane-associated cation-binding protein 1-like protein negatively regulates intercellular movement of BaMV
Source: PubMed Central journal article supplement (PMC5853580; doi:10.1093/jxb/erx307), 2017-08-29
Supplement: erx307_suppl_supplementary_figures_s1_s3.pdf [file erx307_suppl_supplementary_figures_s1_s3.pdf]

NtPIP MGWYQAKVVPKFKQIFDKNQPKKAAAAEACKTFDEAKEQYSKEFEFEKKTELQPKVVEIYEAAAVEIKTLVKGPKVSGLKK  
 AtPCaP1 MGWYNSKVVPKFKKLFKNSAKKAAAAEATKTFDESKEETEEKKTELQPKVVEIYEATSAEVKALVRDPKVVAGLKK  
 VvPCaP1L MGWYKSKVLPKIKKIFEKSGTKRTAAAAEACKSFDDSKEEINKDFEAKKDELQPKVVEIYEASSTEIKTLVKEPKVAGLKK  
 LjPCaP1L MGWYKSKVLPKIKKVFEKNGAKKTA AAAEAIKSFDESKEEYKVFEEKKVELQTKVVEIYEASPAEIKSLVKEQKEAGLKK  
 GmPCaP1 MGWYKSKVLPKIKKVFEKNSTKKAAAAEATKSFDESKEEYKNAFEEKKTELQTKVVEIYEASSTEIKSLVKEPKVAGLKK  
 NbPCaP1L MGWYQAKVVPKFKQIFDKNQPKKAAAAEAWKTFDEAKEQYSKEFEDEKKTELQPKVVEIYEAAAVEIKTLVKGPKVSGLKK  
 1.....10.....20.....30.....40.....50.....60.....70.....

NtPIP HSTQVQKFLDELVKIEFPGSKAVSEASSNFGPSYVSGPVLVFEKVS TFIIVTEEDKKEEFA-----AASEAEATTAAP  
 AtPCaP1 NSAAVQKYLEELVKIEFPGSKAVSEASSSFGAGYVAGPVTFFIFEKVS VFLPEEYKTKETPVEEVKAEFPKTEEPKTEG  
 VvPCaP1L NSTAVQKFLDELVKIEFPGSKAVCEASSKYGPGLVSGPVLVFEKVS TFIIVTEENEEELP-----PPTINTTGEEEA  
 LjPCaP1L NPTEVHKFLLEELAKIEFPGSKVSEASSKFGPALVPGPVLVFEKVS TFIIVTEEK-V EAP-----PA-ETKTEEEAS  
 GmPCaP1 HSTEVQKFLDELVKIDFPGSKAVSEASSKFGPALAGSVPVFFVFEKVS TFIIVTEEKEVEAP-----PAVETKTEETS  
 NbPCaP1L HSTEVQKFLDELVKIEFPGSKVSEASSNFGPSYVSGPVLVFEKVS TLIIVTEEDKKEEFAAIPVA--AASEAEATTTAP  
 81.....90.....100.....110.....120.....130.....140.....150.....

NtPIP VEVKEKEIVVEAEAKKKEEPAPAPAAATPAA-----EVAPAEVAP--AADV--APAKVEEAPAAVAA--  
 AtPCaP1 T-SGEKEEIVE-ETKKGETPETAVVEEKKP-----EVEEKKEEATPAPAVVETPVKEPETTTTAPV--  
 VvPCaP1L S-GKEKEIIVIE-EEKKEE-----VAV-----MVEEKEA-----TEAVA--AA--  
 LjPCaP1L T-TKDREIIVVE-EEKKEEEKPQVAEEETTEKVESEPP-----KEEEKPAEPVVAEAP--PAAKEEEKPV--EPVAE  
 GmPCaP1 SVVKERETVVE-EEKKEEEKPQADETSDEK-----KVEEKQAE-----TAAKEEEKPA--EP--  
 NbPCaP1L VEVKEKEIIVVEAEAKKKEEPAPAPAPAPAPAPAPAPAPAPAPAAAPAAEVAPAEVAP--AADV--APAKVEEAPAAVAA--  
 161.....170.....180.....190.....200.....210.....220.....230.....

NtPIP ---PEPPKA  
 AtPCaP1 ---AEPPKP  
 VvPCaP1L ---AEPKAP  
 LjPCaP1L VEKTEPPKP  
 GmPCaP1 ---AEPPKP  
 NbPCaP1L ---PEPPKA  
 241.....

**Supplementary Figure S1.** Amino acid sequence alignment of PCaP1 with related proteins from various plants: PCP1 (*Arabidopsis thaliana*, At4g20260), DREPP1 (*Nicotiana tabacum*, O19910), DREPP4 (*N. tabacum*, O24124), Q9SMK5 (*Cicer arietinum*) and Q0JPA6 (*Oryza sativa*; gene name, Os1g0233000). Phosphorylation sites were predicted by using NetPhos 2.0 (<http://www.cbs.dtu.dk/services/NetPhos/>). The completely conserved residues have no color background, identical residues are yellow, similar residues are cyan and different residues are black.

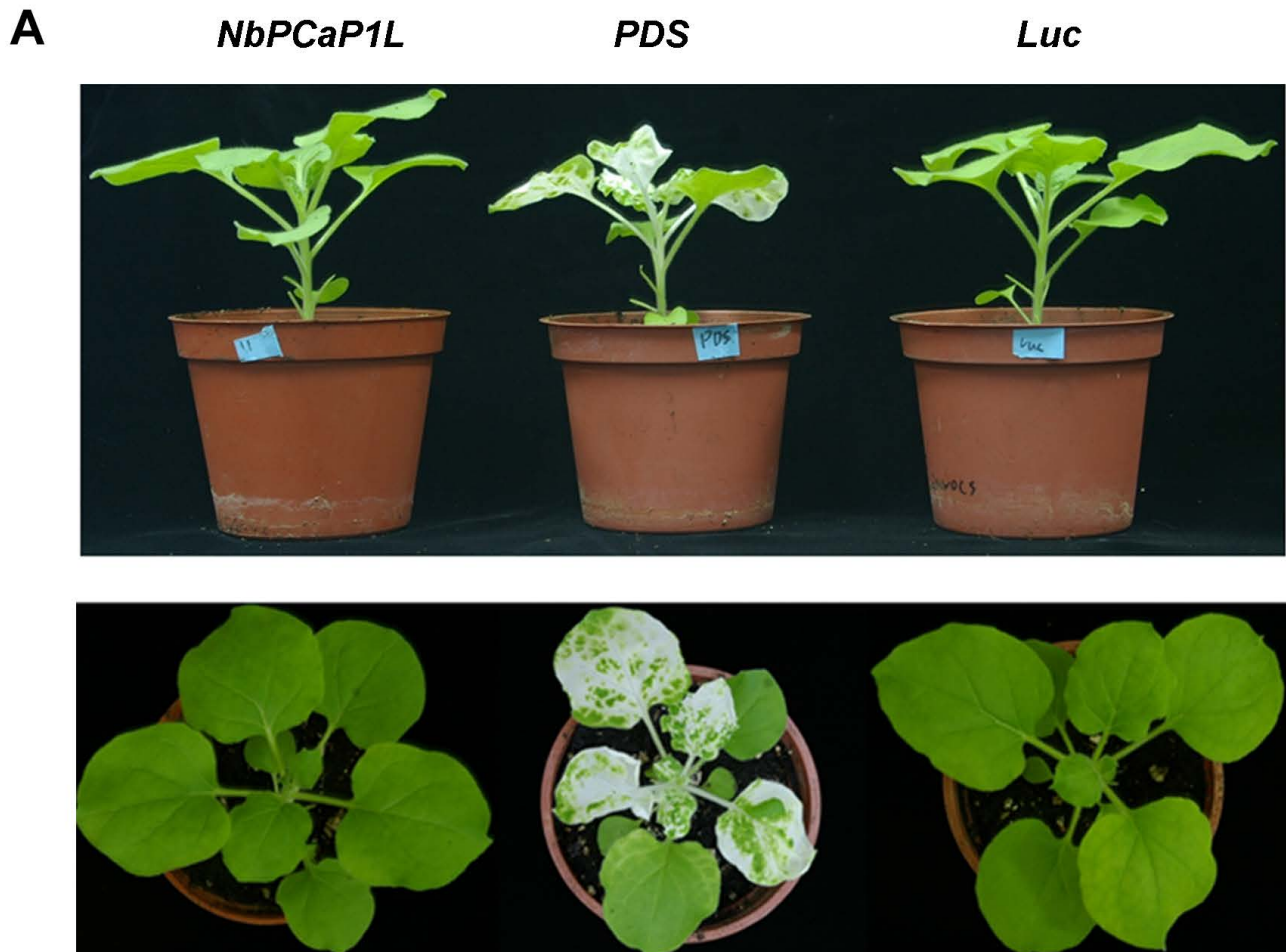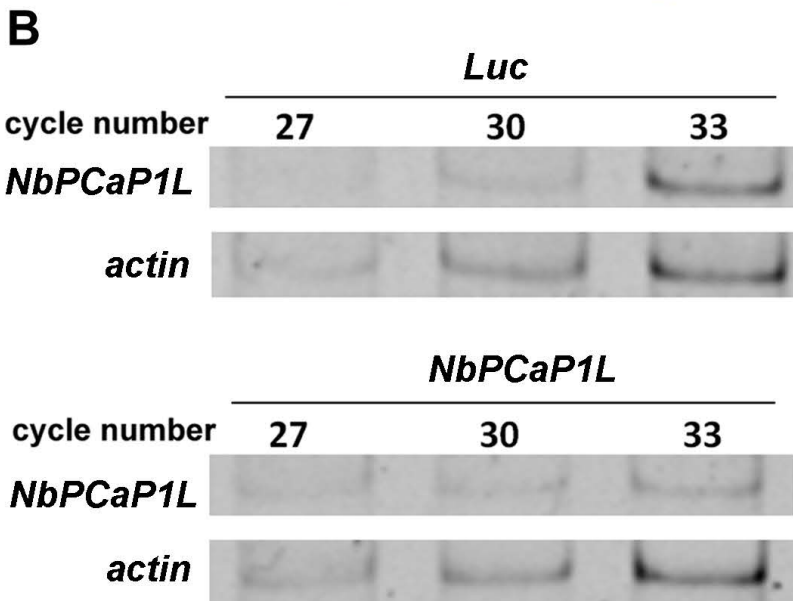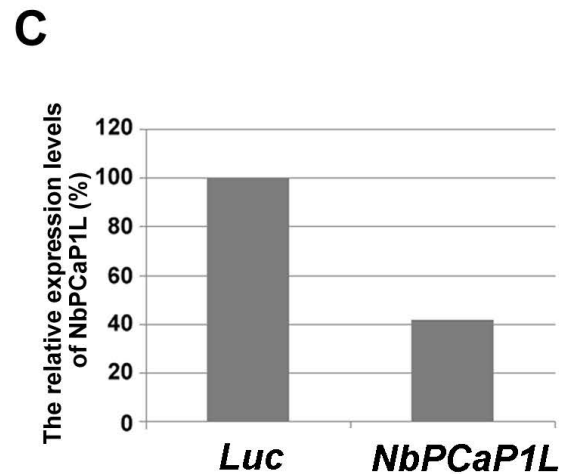

**Supplementary Figure S2.** The morphology of control and *NbPCaP1L* knockdown plants. (A) Morphology of knockdown plants. The positive control is the phytoene desaturase knockdown plant (*PDS*), whereas the negative control is the luciferase gene knockdown plant (*Luc*). (B,C) Semi-quantitative RT-PCR of mRNA level of *NbPCaP1L* in *Luc* and ACGT11-knockdown plants. The cycling number of the RT-PCR is indicated. The expression of  $\beta$ -actin was an internal control.

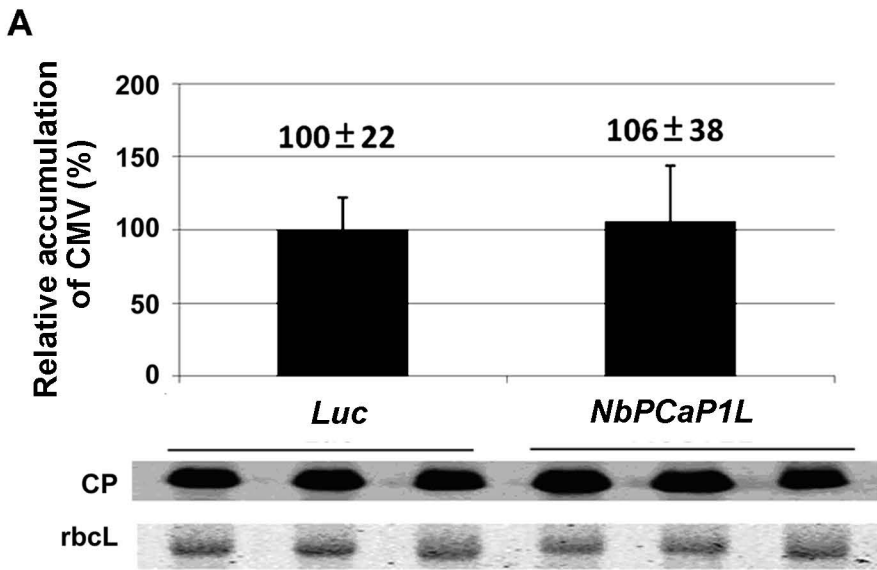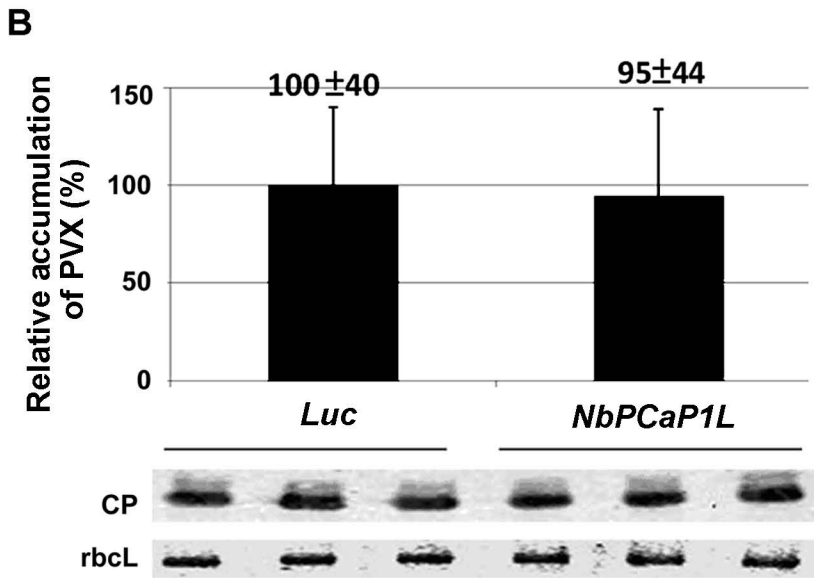

**Supplementary Figure S3.** The relative accumulation of viral coat protein (CP) in *NbPCaP1L*-knockdown and control plants. Western blot analysis of CP accumulation in control and *NbPCaP1L*-knockdown plants inoculated with (A) *Cucumber mosaic virus* (CMV) or (B) *Potato virus X* (PVX) at 5 d post-inoculation. Data are mean ± SD relative accumulation of coat protein from at least 3 independent experiments with at least 3 plants in each experiment. *Luc*: luciferase knockdown control plants; *NbPCaP1L*: *NbPCaP1L*-knockdown plants; CP: coat protein; rbcL: RuBisCO large subunit (the loading control for normalization).
